# Supplementary material for: Distinct Roles for Rac1 in Sertoli Cell Function during Testicular Development and Spermatogenesis
Source: PubMed Central journal article supplement — Cell Rep. Author manuscript; Available in PMC 2020 May 11. (PMC7213061; doi:10.1016/j.celrep.2020.03.077), 2020-04-14
Supplement: NIHMS1584954-supplement-1.pdf [file NIHMS1584954-supplement-1.pdf]

Cell Reports, Volume 31

## Supplemental Information

### **Distinct Roles for *Rac1* in Sertoli Cell Function during Testicular Development and Spermatogenesis**

**Anna Heinrich, Sarah J. Potter, Li Guo, Nancy Ratner, and Tony DeFalco**

**Figure S1**

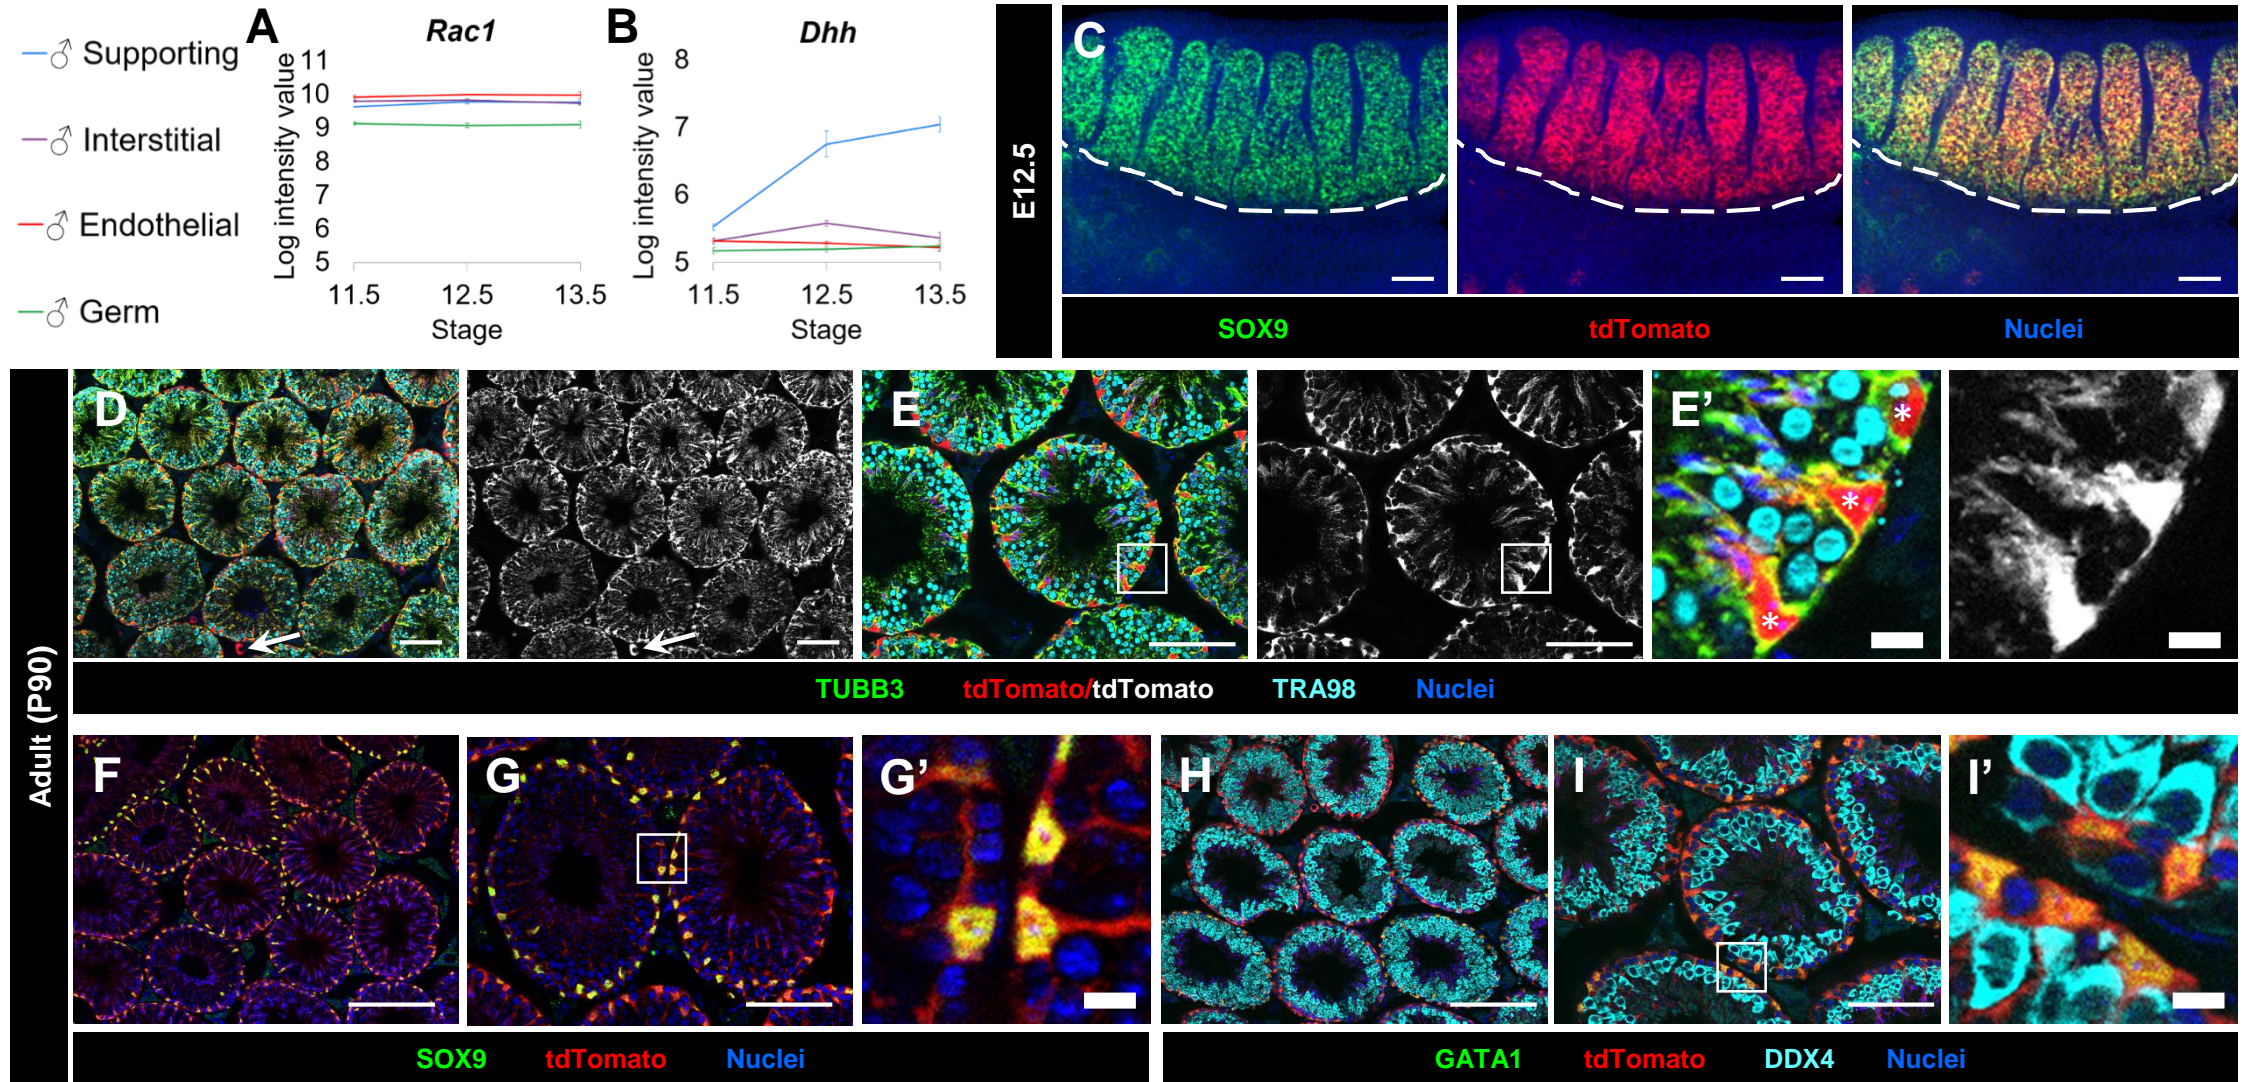

**Figure S1. *Dhh*-Cre is highly efficient and specific for targeting Sertoli cells, Related to Figure 1.**

(A,B) Plots showing gene expression levels of *Rac1* and *Dhh* expression, which were generated from fetal gonad cell-type-specific microarray data (Jameson et al., 2012), where cell lineages (supporting Sertoli cells, interstitial cells, endothelial cells, and germ cells) were independently plotted in different colors. Graph contains data for E11.5, E12.5, and E13.5 XY gonads for each cell type. In general, expression values below 6 are considered background expression levels. *Rac1* is expressed at high levels in all cell types, while *Dhh* becomes highly specific to Sertoli cells early in testicular development. (C-I) Immunofluorescence images of E12.5 (C) and adult P90 (D-I) *Dhh*-Cre; *Rosa*-tdTomato testes. E', G' and I' are higher-magnification images of the boxed regions in E, G, and I. Dashed line in C indicates gonad-mesonephros border. (C) tdTomato specifically co-localizes with Sertoli marker SOX9 in E12.5 fetal testes. (D-I) Lineage tracing of *Dhh*-Cre activity into adulthood reveals highly efficient tdTomato labeling in TUBB3/SOX9/GATA1-positive Sertoli cells, with no labeling in TRA98/DDX4-positive germ cells. We occasionally observed mosaic Cre activity in vasculature-associated cells (arrow in D), as has been previously reported in the testis (Lindeboom et al., 2003). Thin scale bar, 100  $\mu$ m; thick scale bar 10  $\mu$ m.



**Figure S2**

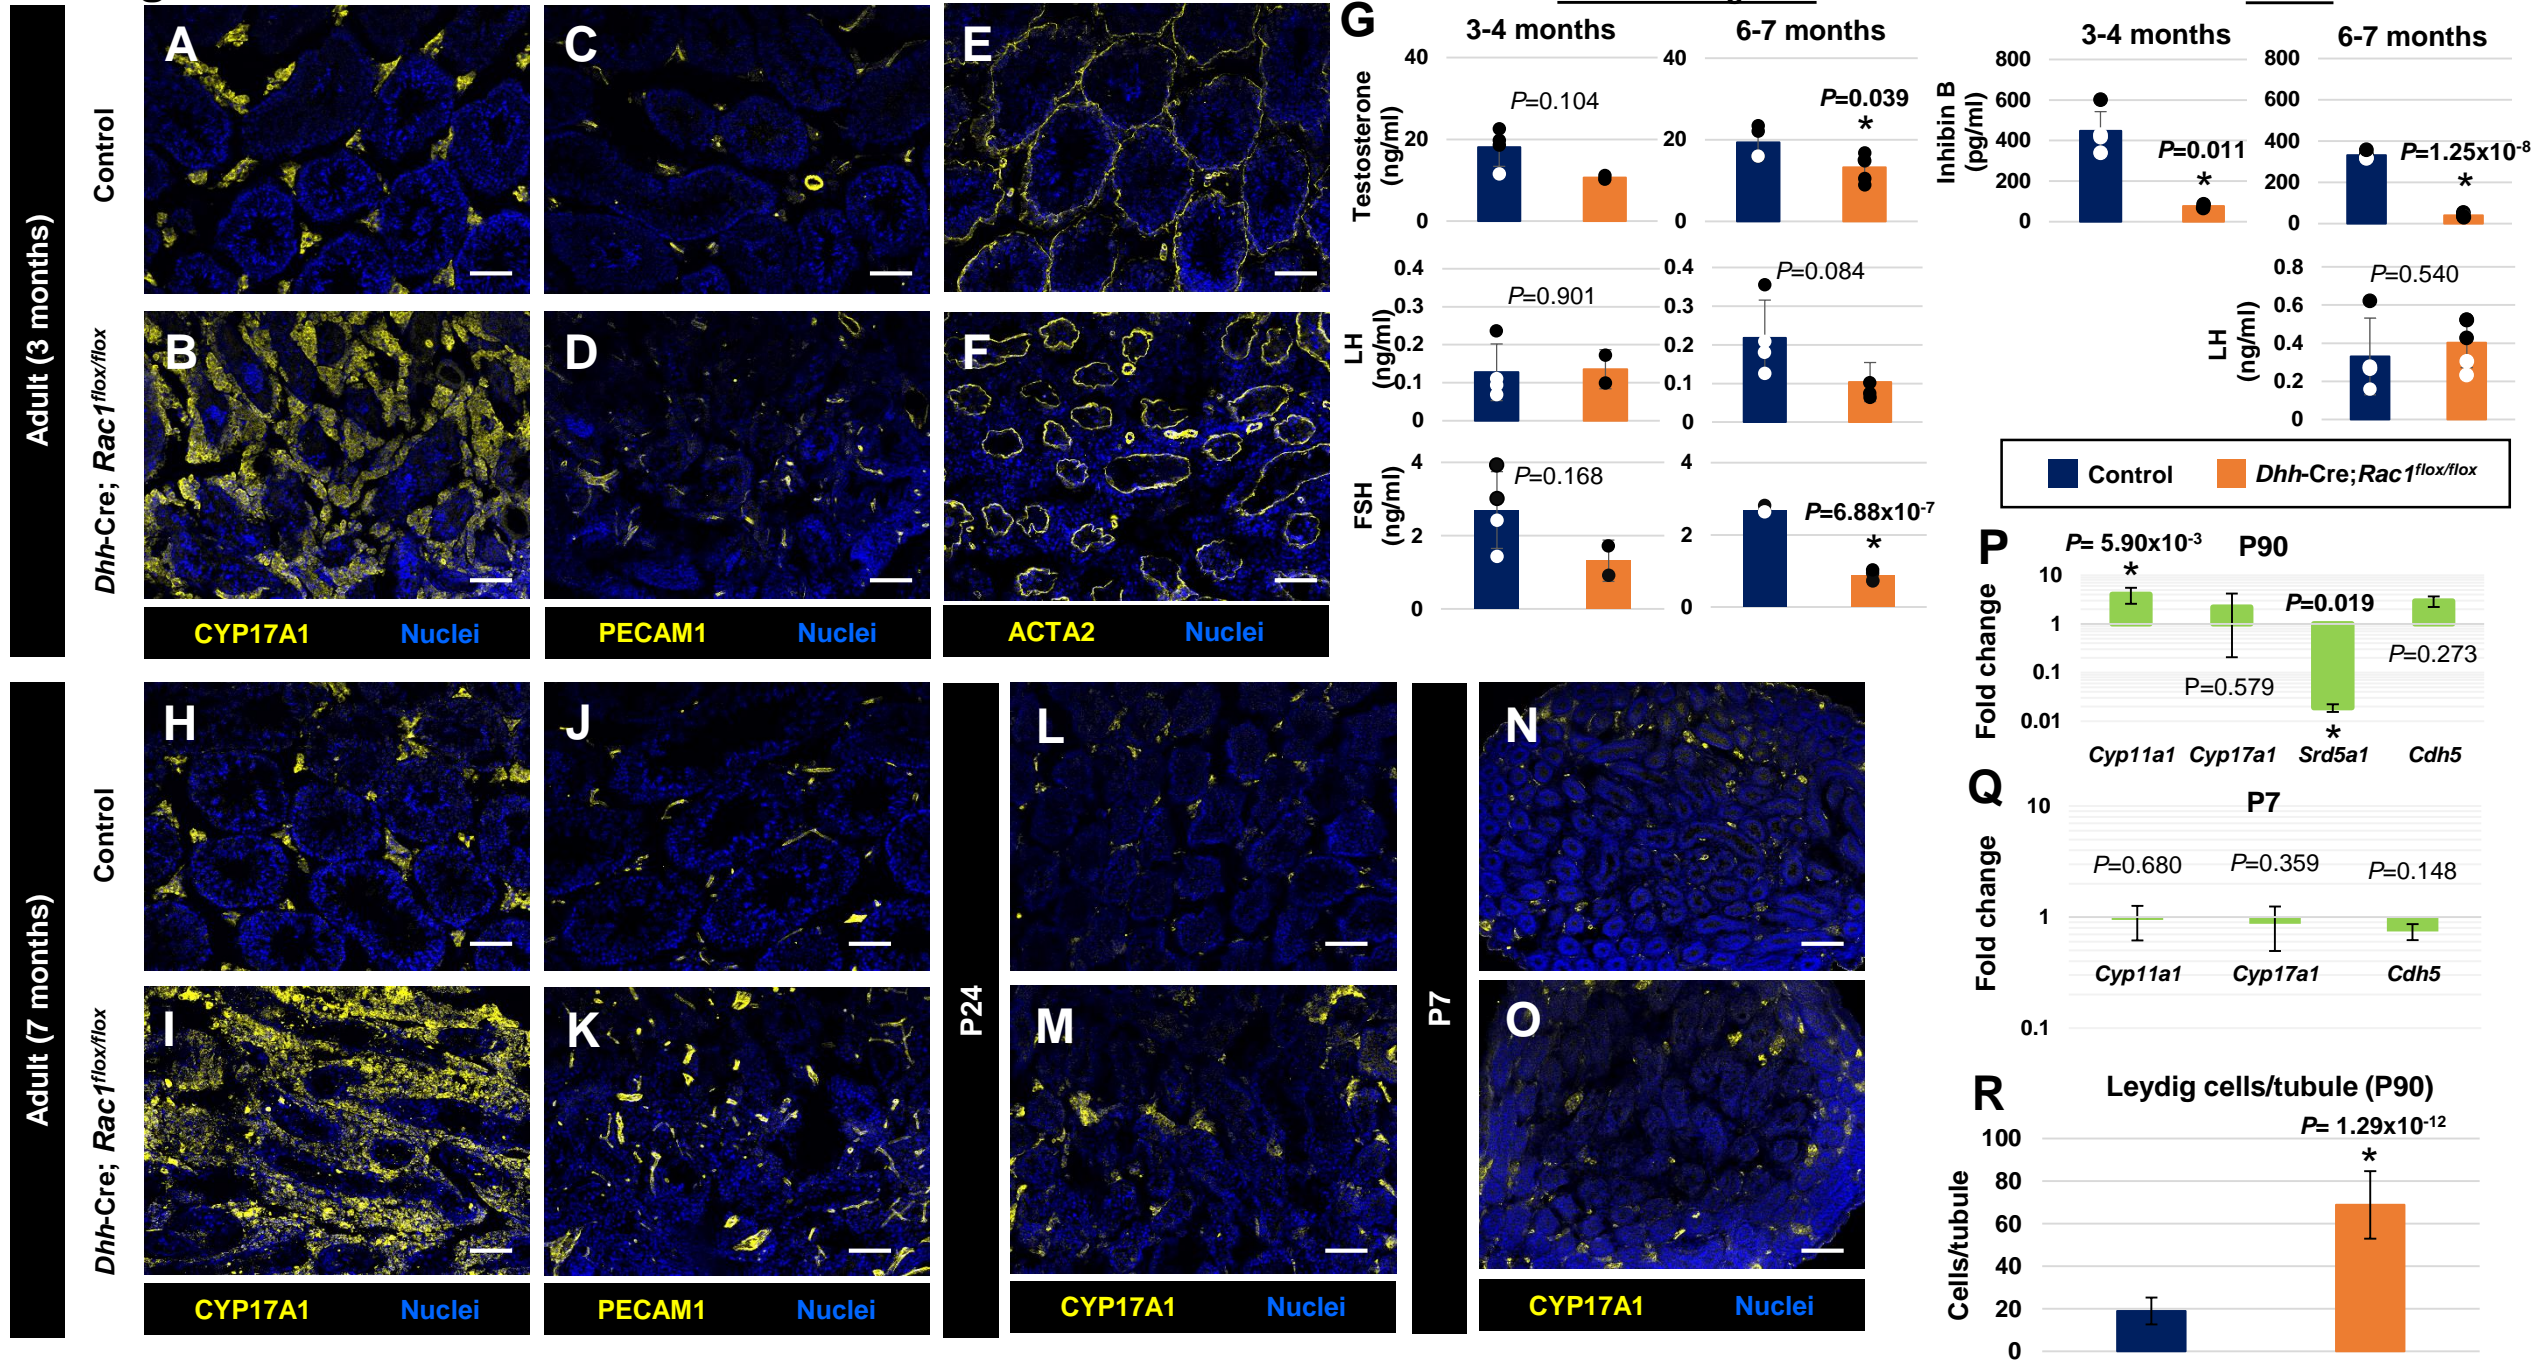

**Figure S2. *Rac1* deletion in Sertoli cells has minimal effects on vascular and Leydig cell development, but disrupts some aspects of hormone production, Related to Figure 1.**

(A-F) Immunofluorescence images of 3-month-old (P90) adult control *Dhh-Cre;Rac1<sup>fllox/+</sup>* (A,C,E) and *Dhh-Cre;Rac1<sup>fllox/fllox</sup>* cKO (B,D,F) testes, showing normal expression of CYP17A1 (Leydig cells), PECAM1 (endothelial cells), and ACTA2 (also known as SMA; marker for peritubular myoid cells and vascular smooth muscle). (G) Graphs showing levels of various hormones in testis homogenate or blood serum from control versus cKO adult males. Each dot in the graphs represents an independent testis or serum sample. Left side shows testicular testosterone (T), luteinizing hormone (LH), and follicle-stimulating hormone (FSH) in 3-4 month old (n=2-4) or 6-7 month old (n=2-4) males, with significantly decreased levels of T and FSH only occurring at 6-7 months old. Right side shows significantly decreased levels of serum Inhibin B in both 3-4 month old (n=2-4) and 6-7 month old (n=2-4) males, but normal levels of serum LH in 6-7 month old (n=2-4) males. Data are shown as mean  $\pm$  SD. *P* values were calculated using a two-tailed Student t-test. (H-K) Immunofluorescence images of 7-month-old adult control *Dhh-Cre;Rac1<sup>fllox/+</sup>* (H,J) and *Dhh-Cre;Rac1<sup>fllox/fllox</sup>* cKO (I,K) testes, showing expression of CYP17A1 and PECAM1. (L,M) Immunofluorescence images of P24 juvenile control *Dhh-Cre;Rac1<sup>fllox/+</sup>* (L) and *Dhh-Cre;Rac1<sup>fllox/fllox</sup>* cKO (M) testes, showing expression of CYP17A1. (N,O) Immunofluorescence images of P7 postnatal control *Rac1<sup>fllox/fllox</sup>* (N) and *Dhh-Cre;Rac1<sup>fllox/fllox</sup>* cKO (O) testes, showing expression of CYP17A1. (P,Q) Quantitative PCR analyses showing fold change of gene expression in controls versus cKO testes (see above for description of controls at each age) at P90 (P) and P7 (Q) for Leydig cell genes *Cyp11a1* (n=5 for P7; n=4 for P90), *Cyp17a1* (n=5 for P7; n=5 for P90), and *Srd5a1* (n=3 for P90) and vascular endothelial *Cdh5* (n=5 for P7; n=3 for P90). (R) Graph showing average number of CYP17A1+ Leydig cells per tubule in control versus cKO P90 testes (n=31, 37, and 30 tubules each from 3 independent control males and n=45, 101, and 65 tubules each from 3 independent cKO males). Data are shown as mean  $\pm$  SD. *P* values were calculated using a two-tailed Student t-test. Scale bar is 100  $\mu$ m throughout all panels.

Figure S3

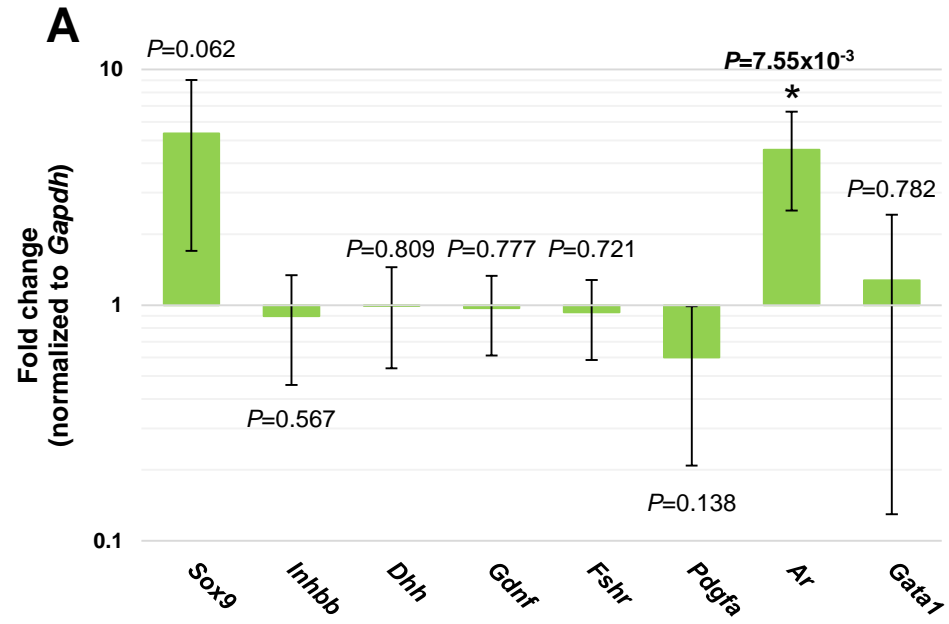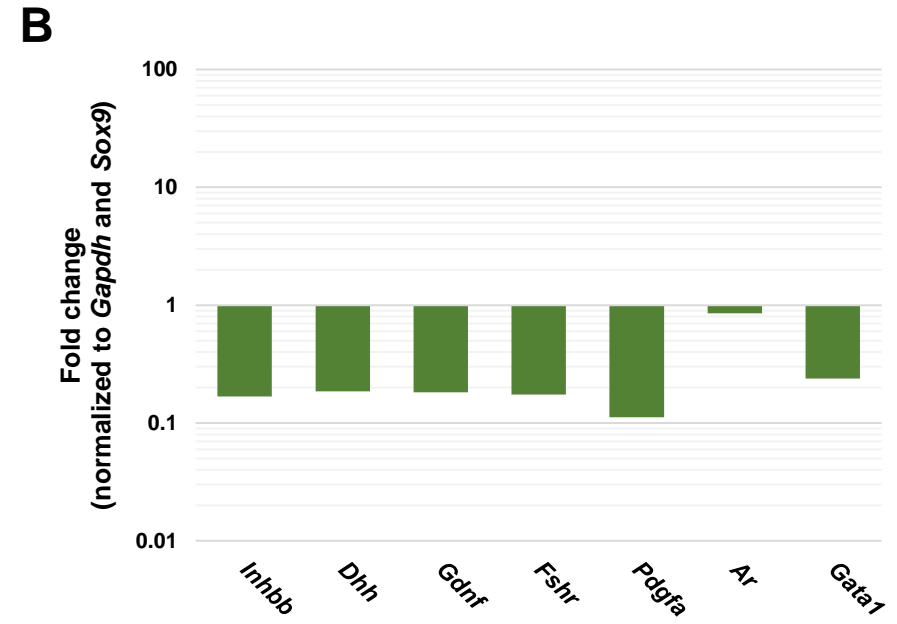

**Figure S3. Expression of Sertoli-expressed differentiation markers and paracrine factors is reduced in adult cKO testes, Related to Figure 1.**

(A) qPCR analyses of P90 *Dhh-Cre;Rac1<sup>flox/+</sup>* control versus *Dhh-Cre;Rac1<sup>flox/flox</sup>* cKO testes, focusing on genes expressed in Sertoli cells, encoding transcription factors (*Sox9*, *Gata1*), hormone receptors (*Fshr*, *Ar*), and paracrine secreted factors (*Inhbb*, *Dhh*, *Gdnf*, *Pdgfa*) (n=6 for *Sox9*; n=3 for *Inhbb*; n=3 for *Dhh*; n=3 for *Gdnf*; n=3 for *Fshr*; n=3 for *Pdgfa*; n=4 for *Ar*; n=3 for *Gata1*). (B) Same data as in A, except data was additionally normalized to *Sox9* (after normalization to *Gapdh*) by average fold change of cKO *Sox9* expression relative to controls. Data are shown as mean  $\pm$  SD in A, and as mean in B. *P* values were calculated using a two-tailed Student t-test.



Figure S4

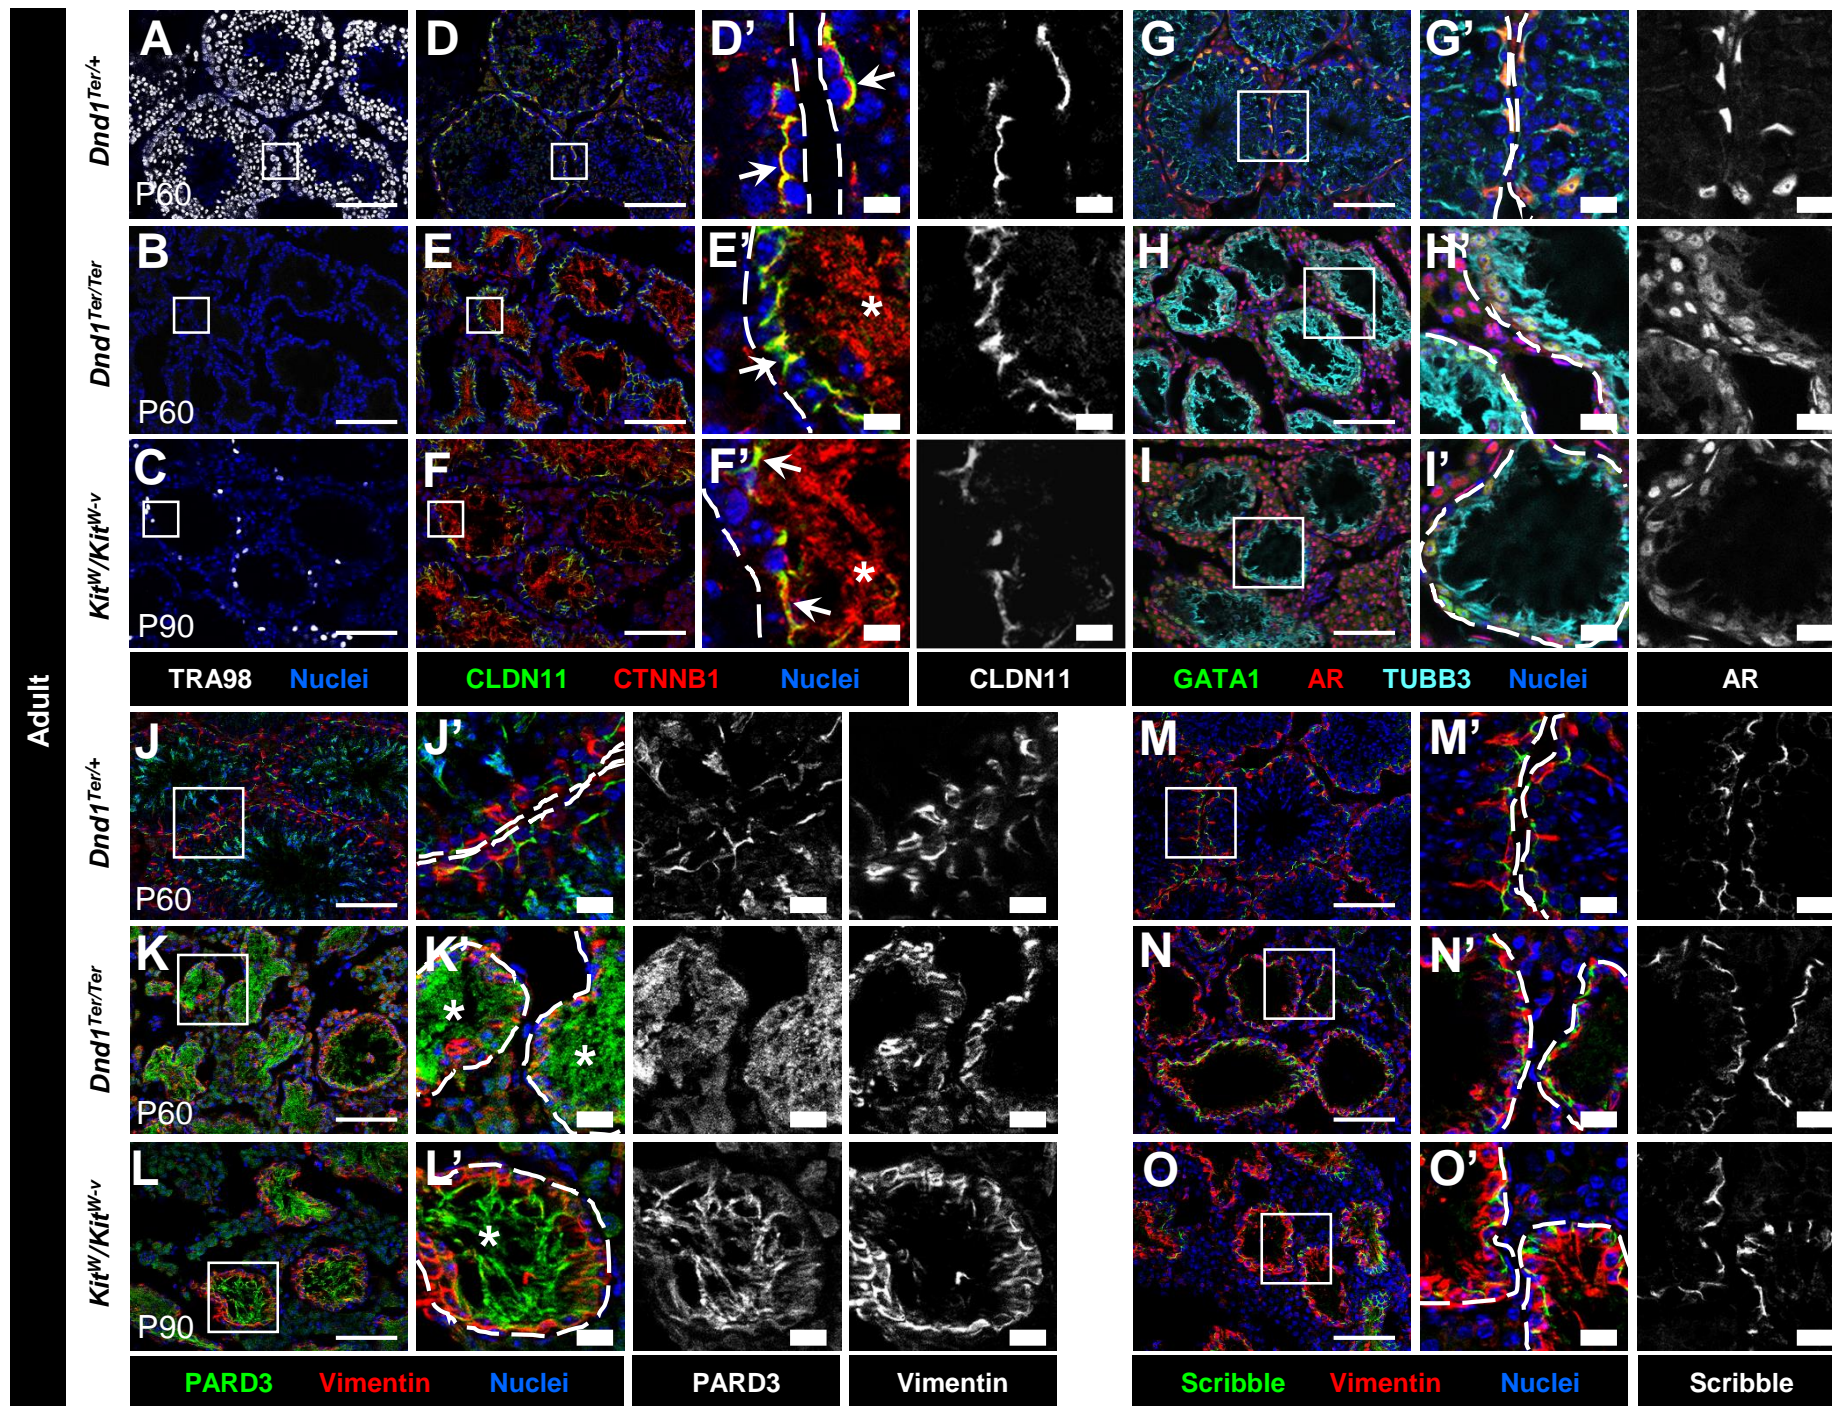



**Figure S4. Localization of apicobasal polarity markers and BTB proteins are mostly, but not completely, maintained in mouse models of germ cell deficiency, Related to Figure 4.**

(A-O) Immunofluorescent images of P60 *Dnd1*<sup>Ter/+</sup> control (A,D,G,J,M), P60 *Dnd1*<sup>Ter/Ter</sup> mutant (B,E,H,K,N), and P90 *Kit*<sup>W/Kit</sup><sup>W-v</sup> compound heterozygous mutant (C,F,I,L,O) testes. D'-O' are higher-magnification images of the boxed regions in D-O. Dashed lines throughout indicate tubule boundaries. (A-C) TRA98 staining reveals extent of germ cell loss in *Ter* and *Kit* mutants. (D-F) CLDN11/CTNNB1 staining outlines normal BTB structure in all models (arrows); however, CTNNB1 expression is also expanded throughout Sertoli cells in germ-cell-deficient testes (asterisks in E' and F'). (G-I) AR nuclear localization is largely maintained in Sertoli cells in all models, although some weak cytoplasmic expression is observed in germ-cell-deficient testes. (J-L) While basal localization of Vimentin is maintained in all samples, PARD3 localization is perturbed in germ-cell-deficient testes (asterisks in K' and L'). (M-O) Scribble expression is maintained normally, i.e., along the BTB and in the basal compartment, in all testes. Thin scale bar, 100  $\mu$ m; thick scale bar 10  $\mu$ m.

**Figure S5**

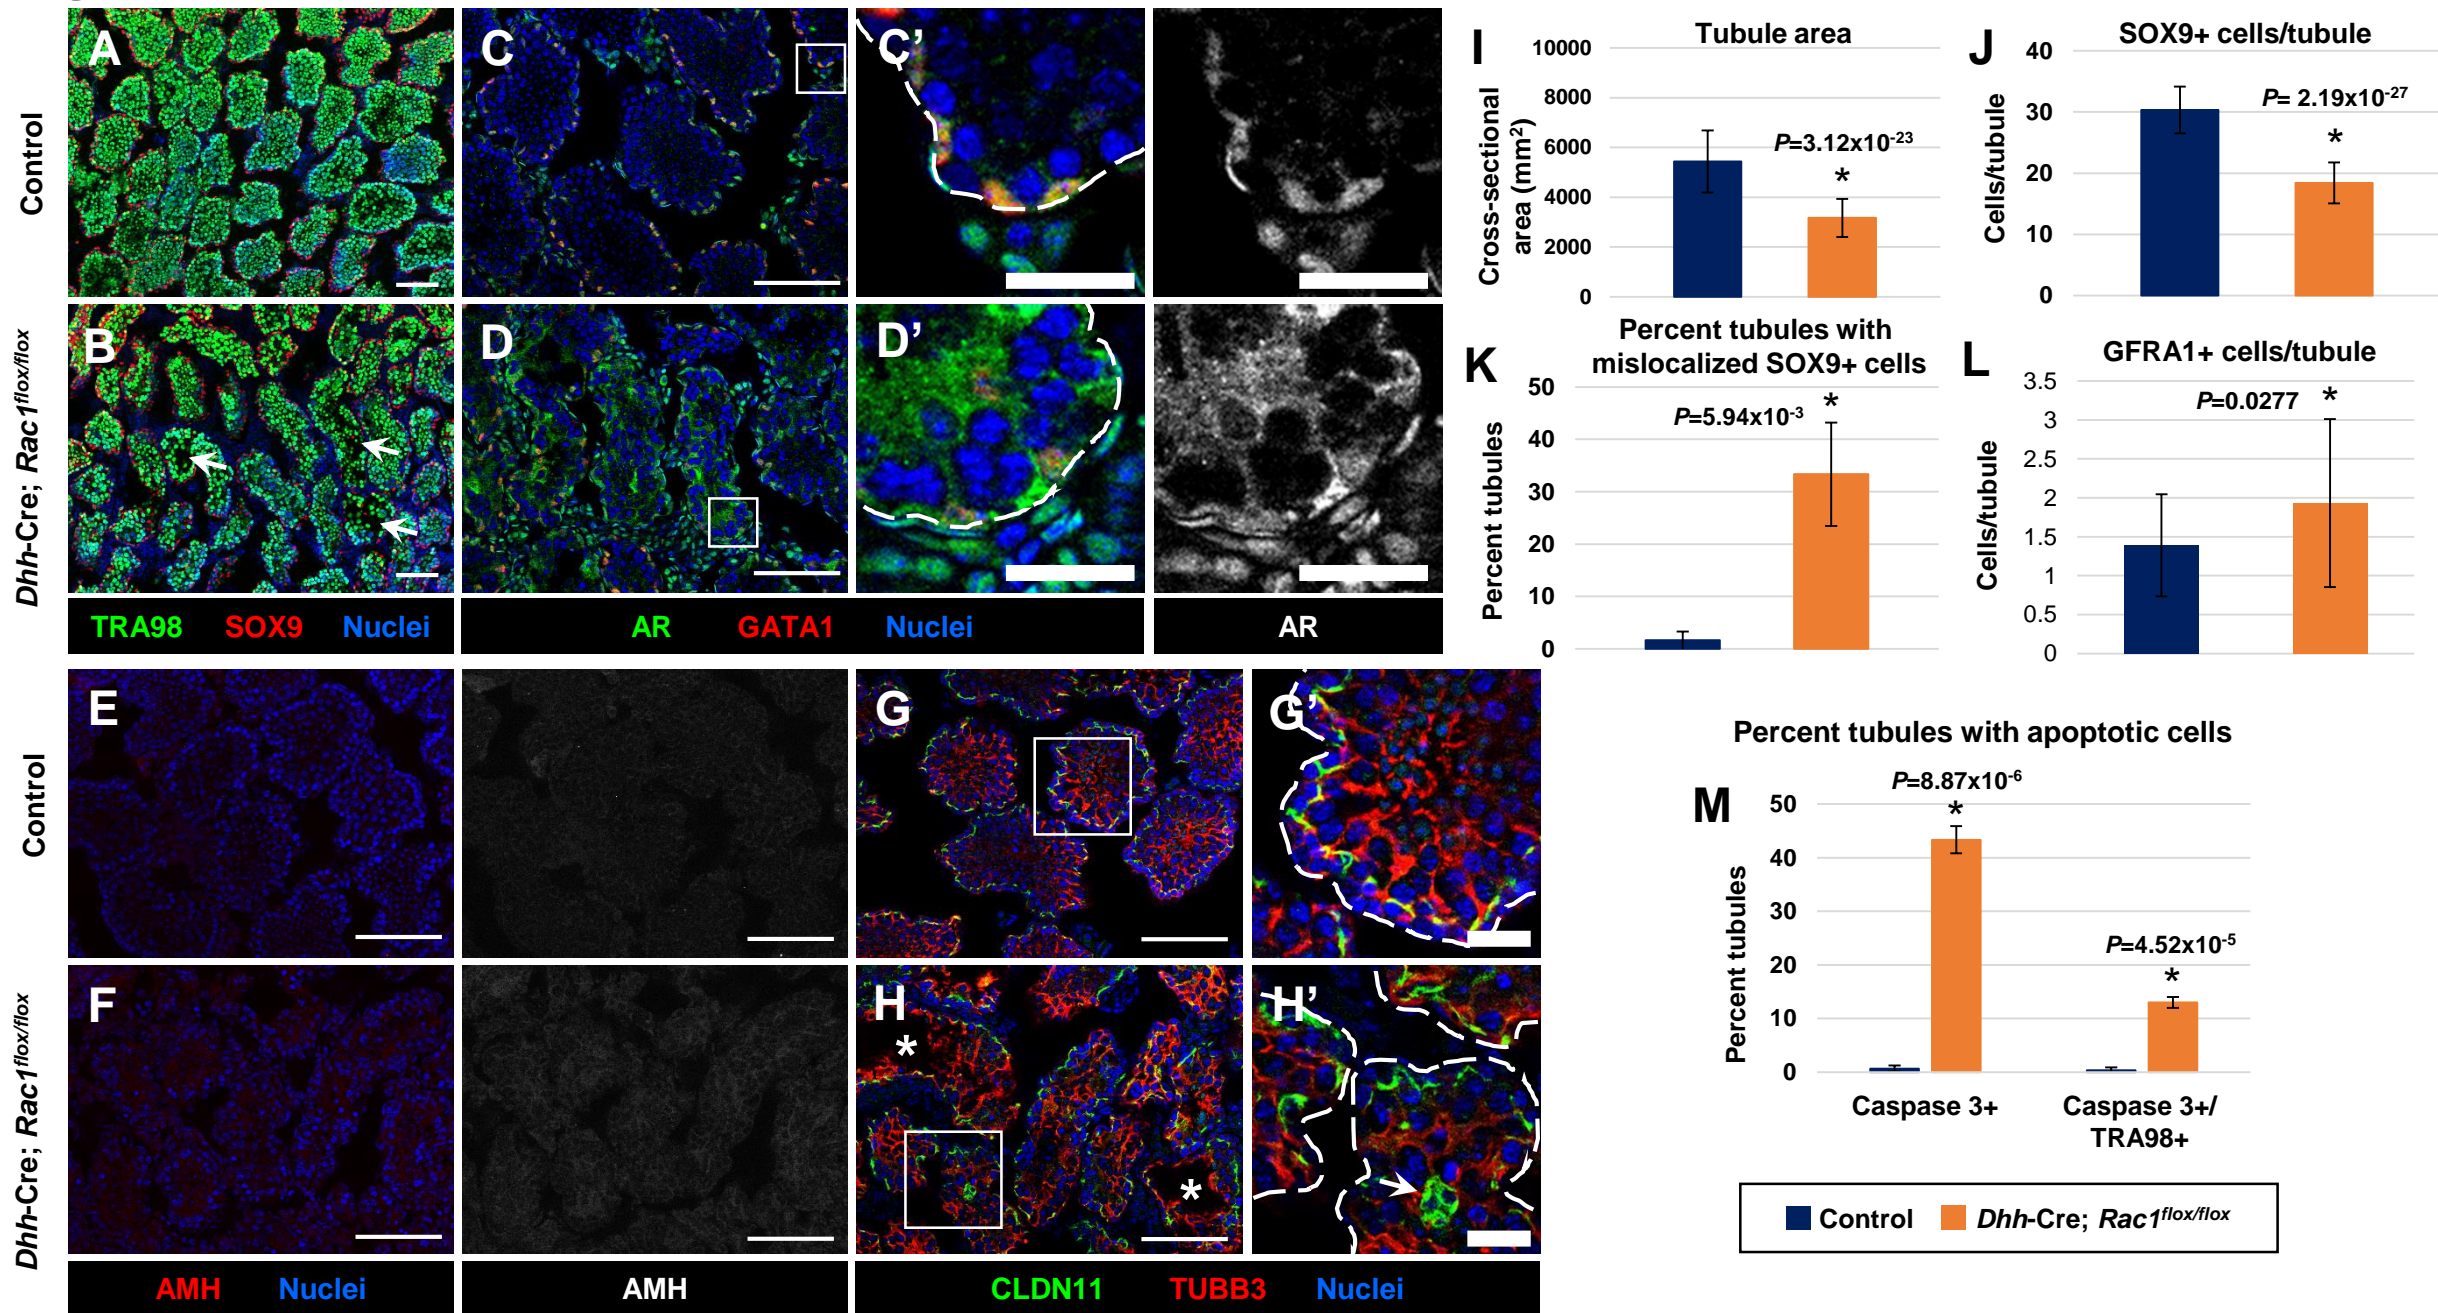

**Figure S5. Onset of testis dysgenesis is evident in juvenile (P24) *Rac1* cKO males, Related to Figure 6.**

(A-H) Immunofluorescence images of P24 control *Dhh-Cre;Rac1<sup>fllox/+</sup>* (A,C,E,G) and *Dhh-Cre;Rac1<sup>fllox/fllox</sup>* cKO (B,D,F,H) testes. C', D', G', and H' are higher-magnification images of the boxed regions in C, D, G, and H. Dashed lines throughout indicate tubule boundaries. (A,B) TRA98 staining reveals patchy germ cell loss in cKO tubules (arrows in B). (C,D) AR subcellular (nuclear) localization is disrupted in cKO tubules. (E,F) AMH expression is not substantially affected in cKO testes. (G,H) CLDN11 staining shows a grossly normal initial formation of the BTB; however, there are aberrant CLDN11 aggregates often seen in the middle of cKO tubules (arrow in H'). Vacuolization of Sertoli cells (TUBB3+) is often seen in cKO tubules (asterisks in H), likely due to germ cell loss. Thin scale bar, 100  $\mu\text{m}$ ; thick scale bar 25  $\mu\text{m}$ . (I) Graph showing average tubule cross-sectional area of P24 control versus cKO testes (n=20 tubules each from 3 independent males). (J) Graph showing cell counts of SOX9+ cells per tubule in P24 control versus cKO testes (n=15 tubules each from 3 independent males). (K) Graph showing percent of tubules displaying SOX9+ Sertoli cells mislocalizing to the tubule lumen in P24 control versus cKO testes (n=20 tubules each from 3 independent control males and n=50 tubules each from 3 independent cKO males). (L) Graph showing average number of GFRA1+ germ cells per tubule (in tubules that contained GFRA1+ cells) in P24 control versus cKO testes (n=25 tubules each from 3 independent males). (M) Graph showing percent tubules containing cleaved Caspase 3+ cells and cleaved Caspase 3+/TRA98+ double-positive germ cells in P24 control versus cKO testes (n=50 tubules each from 3 independent males). Data are shown as mean  $\pm$  SD. *P* values were calculated using a two-tailed Student t-test.



Figure S6

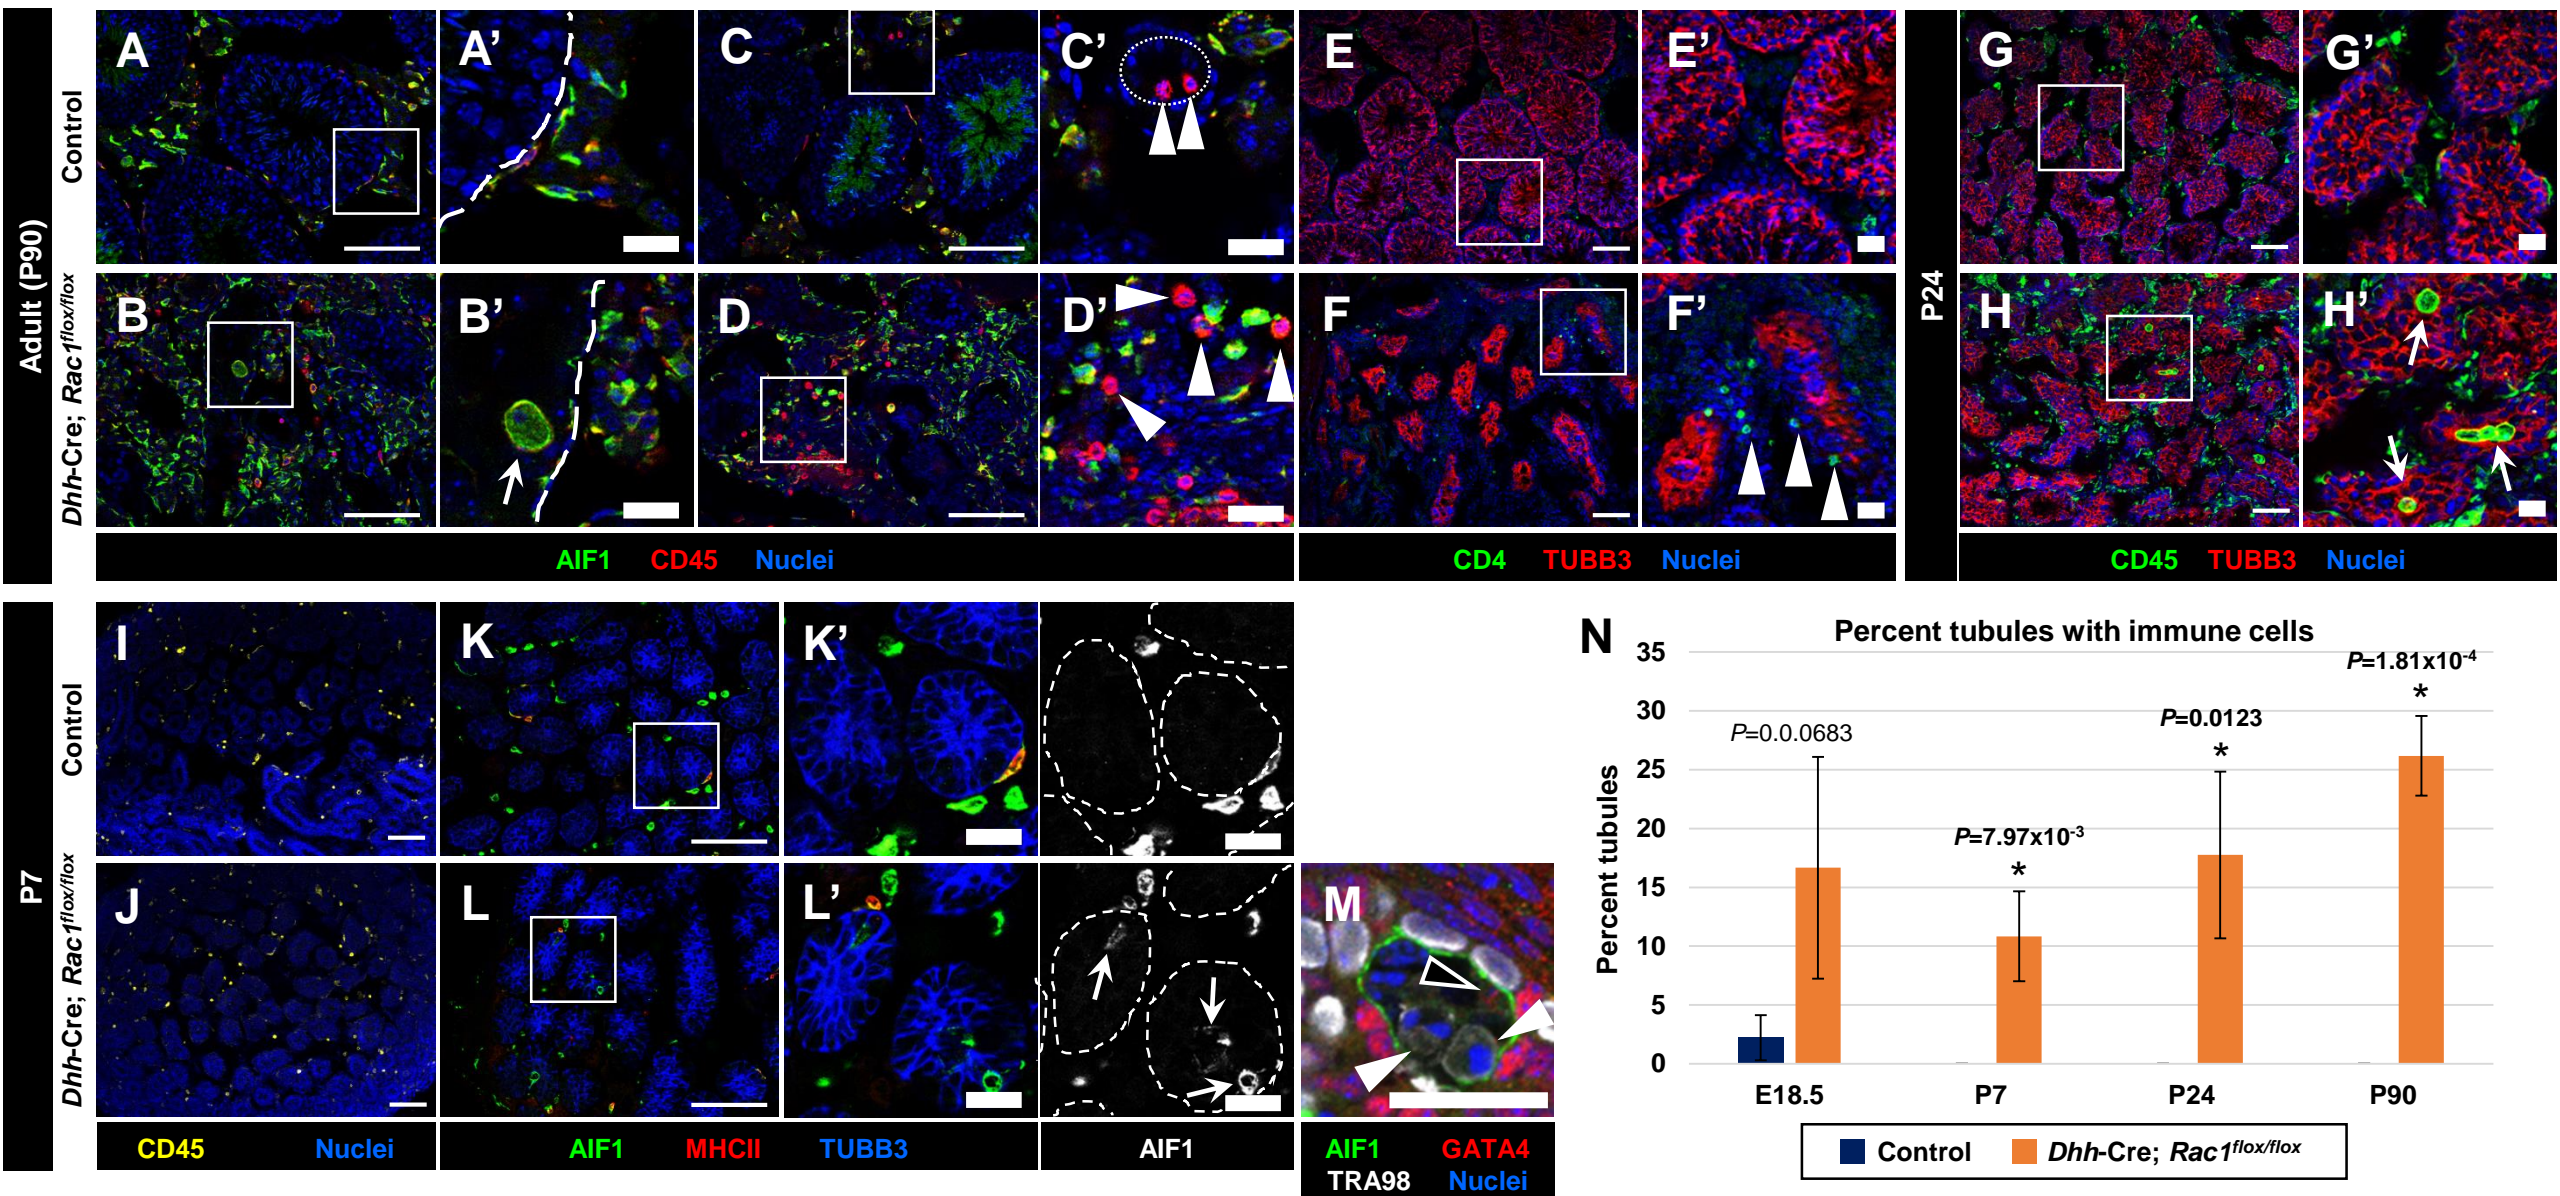

**Figure S6. Immune cells infiltrate into tubules of *Rac1* cKO testes, Related to Figure 6.**

(A-M) Immunofluorescence images of P90 control *Dhh-Cre;Rac1<sup>flox/+</sup>* (A,C,E), P90 *Dhh-Cre;Rac1<sup>flox/flox</sup>* cKO (B,D,F), P24 control *Dhh-Cre;Rac1<sup>flox/+</sup>* (G), P24 *Dhh-Cre;Rac1<sup>flox/flox</sup>* cKO (H), P7 control *Rac1<sup>flox/flox</sup>* (I,K), and P7 *Dhh-Cre;Rac1<sup>flox/flox</sup>* cKO (J,L,M) testes. A'-H' and K'-L' are higher-magnification images of the boxed regions in A-H and K-L. (A-D) There is an increase in CD45<sup>+</sup>/AIF1<sup>+</sup> macrophages in the adult cKO testis, in particular within the tubule lumen (arrow in B'), which are not observed in controls. (C,D) Round CD45-bright cells are more often seen in the interstitium of adult cKO testes (arrowheads in C' and D'), whereas they are only seen within arterioles in control testes (dashed outline in C'). (E,F) CD4 staining reveals an increase in T cell infiltration in cKO testes (arrowheads in F'). (G,H) P24 cKO testes contain an increased number of CD45<sup>+</sup> cells, especially within tubule lumens (arrows in H'). (I-M) At P7, there appears to be a similar overall number of CD45<sup>+</sup> cells (I,J) and AIF1<sup>+</sup>/MHCII<sup>+</sup> macrophages (K,L) in controls versus cKO testes. However, there are macrophages within the tubule lumen (dashed outlines in K' and L') only in cKO testes (arrows in L'), which engulf both Sertoli cells (black arrowhead in M) and TRA98<sup>+</sup> germ cells (white arrowheads in M). Thin scale bar, 100  $\mu$ m; thick scale bar 25  $\mu$ m. (N) Graph showing average percent of tubules containing immune cells in control versus cKO tubules at E18.5, P7, P24, and P90 (E18.5: n=40 tubules each from 3 independent males; P7: n=40 tubules each from 3 independent males; P24: n=40, 36, 39 tubules each from 3 independent males; P90: n=27, 36, 37 tubules each from 3 independent males). Data are shown as mean  $\pm$  SD. *P* values were calculated using a two-tailed Student t-test.



Figure S7

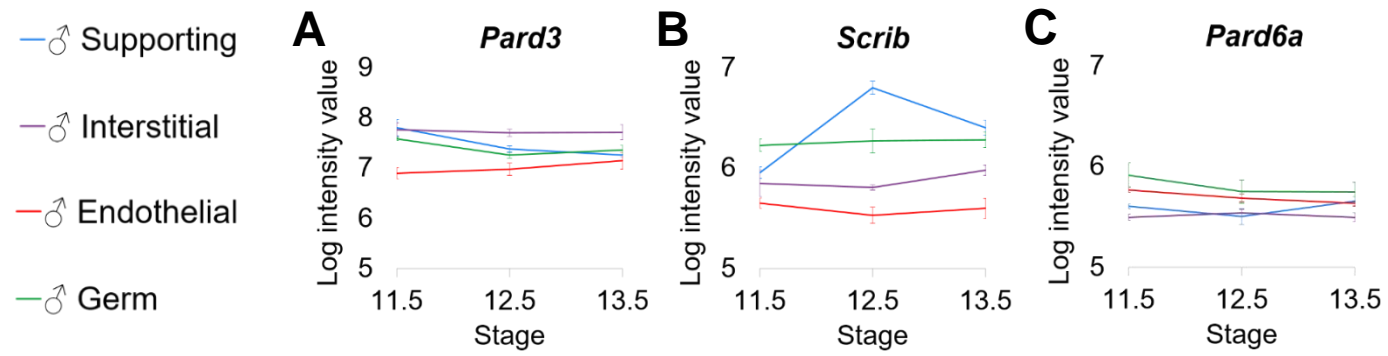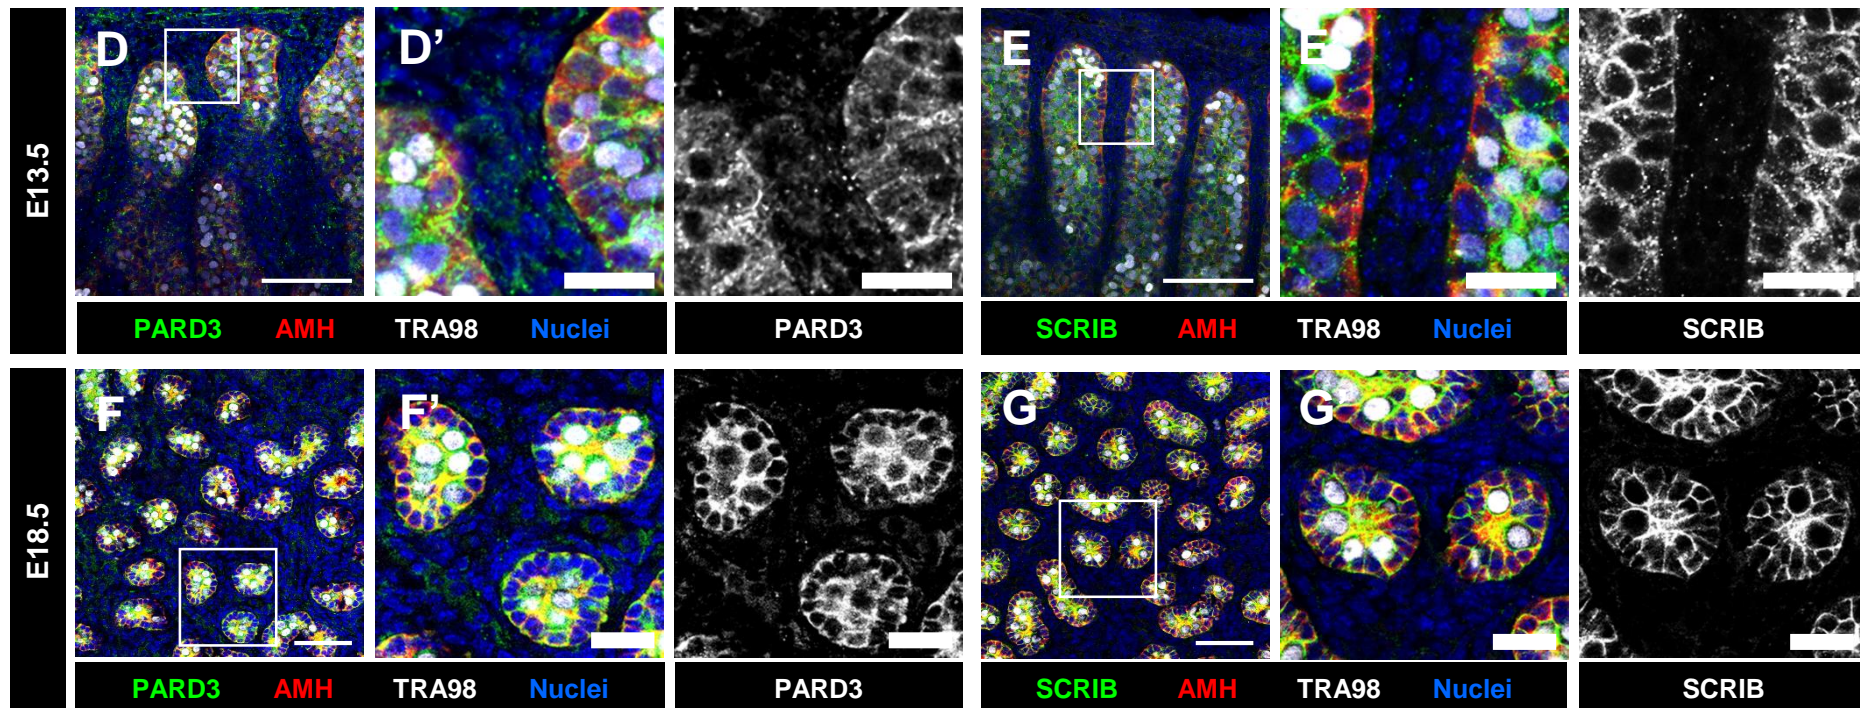



**Figure S7. Apicobasal polarity markers are not specifically localized in fetal Sertoli cells, Related to Figure 7.**

(A-C) Plots showing expression levels of apicobasal cell polarity genes *Pard3* (*Par3*), *Scrib* (*Scribble*), and *Par6da* (*Par6*), which were generated from fetal gonad cell-type-specific microarray data (Jameson et al., 2012), where cell lineages (supporting Sertoli cells, interstitial cells, endothelial cells, and germ cells) were independently plotted in different colors. Graph contains data for E11.5, E12.5, and E13.5 XY gonads for each cell type. In general, expression values below 6 are considered background expression levels. Overall, cell polarity genes in the fetal testis are either expressed non-specifically, i.e., in additional cell types other than Sertoli cells, and/or at very low/background levels. (D-G) Immunofluorescence images of E13.5 CD-1 (D,E) and E18.5 *Dhh-Cre; Rac1<sup>lox/+</sup>* control (F,G) fetal testes. D'-G' are higher-magnification images of the boxed regions in D-G. Apicobasal polarity markers PARD3 (apical) and SCRIB (basal) are both expressed in Sertoli cells at E13.5 and E18.5, but do not exhibit any specific subcellular localization or apicobasal enrichment. Thin scale bar, 100  $\mu\text{m}$ ; thick scale bar 25  $\mu\text{m}$ .

| <b>Gene name</b>                  | <b>Sequence (5' to 3')</b>  |
|-----------------------------------|-----------------------------|
| <i>Amh</i> forward                | CCACACCTCTCTCCACTGGTA       |
| <i>Amh</i> reverse                | GGCACAAAGGTTTCAGGGGG        |
| <i>Ar</i> forward                 | CAGGAGGTAATCTCCGAAGGC       |
| <i>Ar</i> reverse                 | ACAGACACTGCTTTACACAACCTC    |
| <i>Cdh5</i> forward               | TCCTCTGCATCCTCACTATCACA     |
| <i>Cdh5</i> reverse               | GTAAGTGACCAACTGCTCGTGAAT    |
| <i>Cyp11a1</i> forward            | GGAGGAAGCCGACAACAATGA       |
| <i>Cyp11a1</i> reverse            | TCCACCTCACACGGTTCTCAA       |
| <i>Cyp17a1</i> forward            | CAGAGAAGTGCTCGTGAAGAAG      |
| <i>Cyp17a1</i> reverse            | AGGAGCTACTACTATCCGCAA       |
| <i>Ddx4</i> forward               | TACTGTCAGACGCTCAACAGGA      |
| <i>Ddx4</i> reverse               | ATTC AACGTGTGCTTGCCCT       |
| <i>Dhh</i> forward                | GGCGCAGACCGCCTGATG          |
| <i>Dhh</i> reverse                | AAGGCACGGCCTTCGTAGTGG       |
| <i>Fshr</i> forward               | GGGATCTGGATGTCATCACT        |
| <i>Fshr</i> reverse               | GGAGAACACATCTGCCTCTA        |
| <i>Gapdh</i> forward              | AGGTCGGTGTGAACGGATTTG       |
| <i>Gapdh</i> reverse              | TGTAGACCATGTAGTTGAGGTCA     |
| <i>Gata1</i> forward              | TGGGGACCTCAGAACCCTTG        |
| <i>Gata1</i> reverse              | GGCTGCATTTGGGGAAGTG         |
| <i>Gdnf</i> forward               | GACTTGGGTTTGGGCTATGA        |
| <i>Gdnf</i> reverse               | AACATGCCTGGCCTACTTTG        |
| <i>Gfra1</i> forward (P7 assays)  | CACTCCTGGATTTGCTGATGT       |
| <i>Gfra1</i> reverse (P7 assays)  | AGTGTGCGGTACTTGGTGC         |
| <i>Gfra1</i> forward (P90 assays) | CCAATGTATCGGGCAGTACACA      |
| <i>Gfra1</i> reverse (P90 assays) | CCAGCGAGACCATCCTTTCC        |
| <i>Id4</i> forward                | CAGTGCGATATGAACGACTGC       |
| <i>Id4</i> reverse                | GACTTTCTTGTTGGGCGGGAT       |
| <i>Inhbb</i> forward              | GAGCGCGTCTCCGAGATCATCA      |
| <i>Inhbb</i> reverse              | CGTACCTTCCCTCTGCTGCCCTT     |
| <i>Kit</i> forward                | CATGGCGTTCCTCGCCT           |
| <i>Kit</i> reverse                | GCCCGAAATCGAAATCTTT         |
| <i>Pdgfa</i> forward              | GACGGTCATTTACGAGATACCTC     |
| <i>Pdgfa</i> reverse              | CTACGCCTTCCTGTCTCCTC        |
| <i>Pou5f1</i> forward             | GGAGGAAGCCGACAACAATGA       |
| <i>Pou5f1</i> reverse             | TCCACCTCACACGGTTCTCAA       |
| <i>Sox9</i> forward               | GCGGAGCTCAGCAAGACTCTG       |
| <i>Sox9</i> reverse               | ATCGGGGTGGTCTTTCTTGTG       |
| <i>Srd5a1</i> forward             | GAGTTGGATGAGTTGCGCCTA       |
| <i>Srd5a1</i> reverse             | GGACCACTGCGAGGAGTAG         |
| <i>Stra8</i> forward              | GCAGGTTGAAGGATGCTTTGAGC     |
| <i>Stra8</i> reverse              | CCTAAGGAAGGCAGTTTACTCCCAGTC |

**Table S1. qPCR primers used in this study, Related to STAR Methods.** Sequences of primers used for quantitative real-time PCR (qPCR) in this study (in alphabetical order).
